# Supplementary material for: Thermodynamic assessment of Gd-doped CeO2 for microwave-assisted thermochemical reduction
Source: Royal Society of Chemistry journal article supplement (doi:10.1039/d4ta05804f), 2024-01-01
Supplement: d4ta05804f1.pdf [file d4ta05804f1.pdf]

# Supplementary Information

## Thermodynamic assessment of Gd-doped CeO<sub>2</sub> for microwave-assisted thermochemical reduction

Dongkyu Lee,<sup>‡a</sup> Jaemin Yoo,<sup>‡b</sup> Gunsu S. Yun<sup>\*b,c</sup> and Hyungyu Jin<sup>\*a,d</sup>

<sup>a</sup>*Department of Mechanical Engineering, Pohang University of Science and Technology (POSTECH), Pohang 37673, Republic of Korea*

<sup>b</sup>*Division of Advanced Nuclear Engineering, Pohang University of Science and Technology (POSTECH), Pohang 37673, Republic of Korea*

<sup>c</sup>*Department of Physics, Pohang University of Science and Technology (POSTECH), Pohang 37673, Republic of Korea*

<sup>d</sup>*Adjunct Professor, Institute for Convergence Research and Education in Advanced Technology, Yonsei University, Seoul 03722, Republic of Korea*

<sup>‡</sup>D. Lee and J. Yoo contributed equally to this work

<sup>\*</sup> Corresponding authors: hgjin@postech.ac.kr (H. Jin), gunsu@postech.ac.kr (G. S. Yun)

## 1 **S1. Microwave power transfer from source to sample-loaded cavity**

2 In typical electric circuit analysis, lumped elements are used. This means that the components  
3 are not affected by the physical size of the circuit. However, suppose the wavelength of the  
4 high-frequency (such as RF, microwave) power source is smaller or similar to the physical size  
5 of the circuit (considered distributed elements). In that case, the voltage and current can vary  
6 significantly in amplitude and phase along the line length. Therefore, if these characteristics  
7 are not considered, the microwave signal will be reflected from the load, resulting in a decrease  
8 in the power reaching the load. Transmission line theory is utilized for the efficient delivery of  
9 microwave power to load.<sup>1</sup>

$$Return\ Loss = -20\log(|\Gamma|) = -S_{11}(f) \quad (S1)$$

$$P_{eff}(f) = P(1 - |S_{11}(f)|^2) \quad (S2)$$

$$f_0 \equiv f_{nml} = \frac{c}{2\pi\sqrt{\epsilon_r\mu_r}\sqrt{\left(\frac{P_{nm}^{TE}}{r}\right)^2 + \left(\frac{l\pi}{h}\right)^2}} \quad (S3)$$

10 **Equation (S1)** shows the expression for the return loss of the reflection coefficient  $\Gamma$ , where  $\Gamma$   
11 corresponds to the voltage ratio of reflected voltage ( $V_{ref}$ ) divided by incident voltage ( $V_{inc}$ ).  
12  $-S_{11}$  expressed as a function of frequency is equivalent to return loss and can be measured with  
13 a network analyzer. Additionally, this value can be obtained from a spectrum analyzer for a  
14 single frequency used in this paper. The effective microwave power  $P_{eff}(f)$  delivered to the  
15 sample-loaded cavity can be expressed as **equation (S2)**, where  $P$  represents the amplified  
16 microwave output power. Meanwhile, the resonant frequency  $f_0$  for the cylindrical cavity is  
17 defined only in TE (Transverse Electric) mode in this work, as shown in **equation (S3)**. The  
18 term  $c$  is the speed of light,  $\epsilon_r$  is the relative permittivity of the filled medium inside the cavity,  
19  $\mu_r$  is the relative permeability of the filled medium inside the cavity, and  $P_{nm}^{TE}$  is  $m^{th}$  zero of the  
20  $n^{th}$  Bessel function. The values  $r$  and  $h$  represent the radius and height of the cavity,

1 respectively. Due to the nature of the resonance mode, when a driving frequency  $f_d$  different  
2 from  $f_0$  is applied to the cavity, the reflection ratio of power increases ( $|S_{11}(f)|$  increases),  
3 resulting in a decrease in the power transfer ratio  $(1 - |S_{11}(f)|^2)$  to the cavity. For the case of  
4 literature<sup>2,3</sup> and our work, when the temperature of the metal oxides is increased via microwave  
5 heating,  $f_0$  of the sample-loaded cavity decreases. Therefore,  $P_{eff}(f)$  is maximized by tracking  
6 the continuous shift of  $f_0$  and matching  $f_d$  to  $f_0$ .

7

8

9

10

11

12

13

14

15

16

17

18

19

20

| $\delta$ | 1000/T | $\ln(P(O_2))$ | Slope  | $\Delta H_0$<br>(kJ/mol <sub>O</sub> ) |
|----------|--------|---------------|--------|----------------------------------------|
| 0.0045   | 1.45   | -8.52         |        |                                        |
|          | 1.38   | -5.00         | -45.86 | 190.64                                 |
|          | 1.34   | -4.49         | -14.45 | 60.08                                  |
|          | 1.19   | -2.28         | -14.66 | 60.93                                  |
| 0.0065   | 1.40   | -8.52         |        |                                        |
|          | 1.30   | -5.00         | -34.89 | 145.03                                 |
|          | 1.25   | -4.49         | -11.05 | 45.92                                  |
|          | 1.09   | -2.28         | -13.70 | 56.95                                  |
| 0.0085   | 1.35   | -8.52         |        |                                        |
|          | 1.23   | -5.00         | -29.21 | 121.53                                 |
|          | 1.18   | -4.49         | -9.38  | 39.00                                  |
|          | 1.01   | -2.28         | -13.19 | 54.82                                  |
| 0.0105   | 1.30   | -8.52         |        |                                        |
|          | 1.17   | -5.00         | -25.79 | 107.20                                 |
|          | 1.11   | -4.49         | -8.42  | 35.02                                  |
| 0.0125   | 1.26   | -8.52         |        |                                        |
|          | 1.11   | -5.00         | -23.54 | 97.85                                  |
|          | 1.05   | -4.49         | -7.83  | 32.53                                  |
| 0.0145   | 1.22   | -8.52         |        |                                        |
|          | 1.06   | -5.00         | -21.98 | 91.37                                  |
|          | 0.99   | -4.49         | -7.43  | 30.89                                  |

1 **Table S1** Enthalpy changes based on slope analysis between consecutive data points in Figure  
2 7 of the main text. The slope represents the  $\Delta \ln(P(O_2))/\Delta(1000/T)$  obtained from the data  
3 points of the previous and the corresponding rows.

## References

1. Pozar, D. M. *Microwave Engineering*. (Wiley, Hoboken, NJ, 2012).
2. Catala-Civera, J. M. *et al.* Dynamic Measurement of Dielectric Properties of Materials at High Temperature During Microwave Heating in a Dual Mode Cylindrical Cavity. *IEEE Trans. Microwave Theory Techn.* **63**, 2905–2914 (2015).
3. Serra, J. M. *et al.* Hydrogen production via microwave-induced water splitting at low temperature. *Nat Energy* **5**, 910–919 (2020).
